# Supplementary material for: Mucor circinelloides Thrives inside the Phagosome through an Atf-Mediated Germination Pathway
Source: PubMed Central journal article supplement (PMC6428757; doi:10.1128/mbio.02765-18), 2019-02-05
Supplement: mBio.02765-18-sf001.pdf [file mBio.02765-18-sf001.pdf]

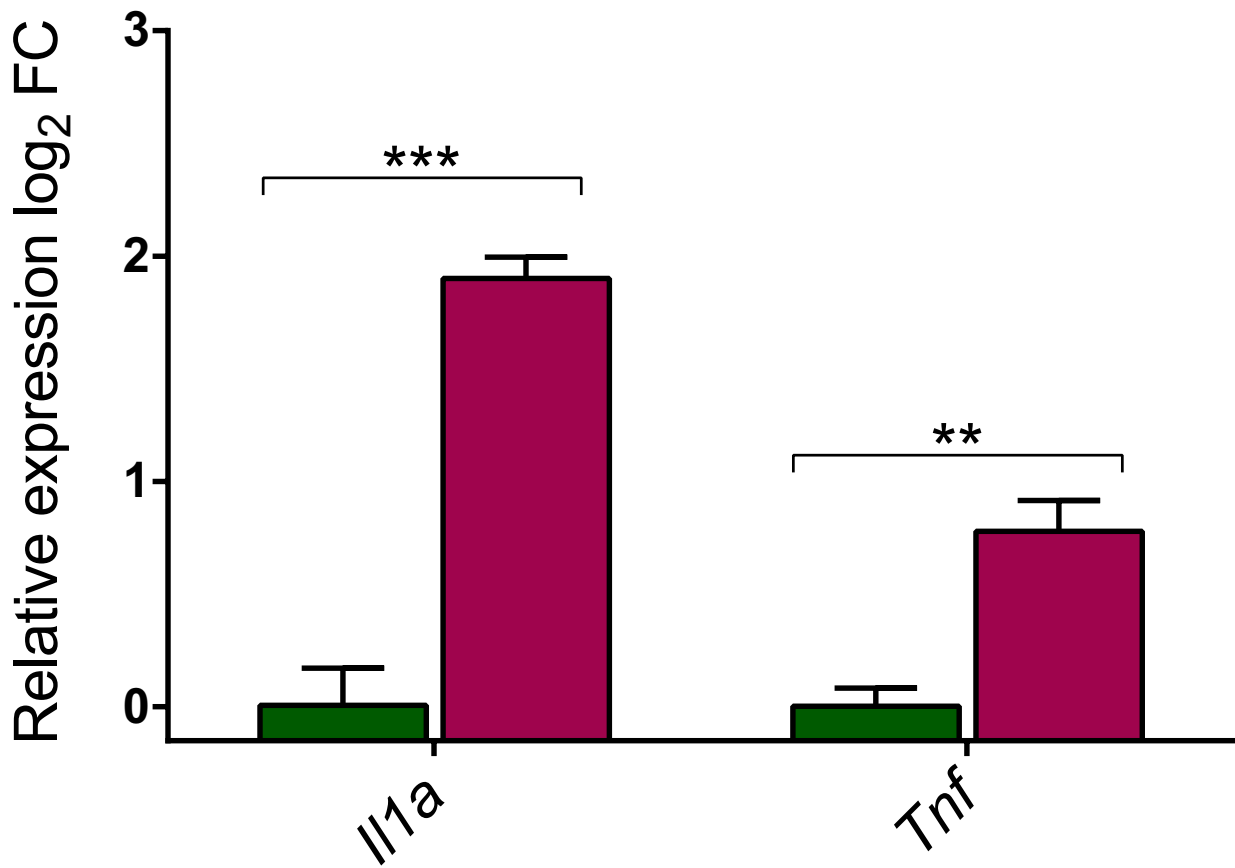

■ Mφ + Avirulent (NRRL3631)  
■ Mφ + Virulent (R7B)
